# Supplementary material for: Smoking and Cannabis Use among Childhood Cancer Survivors: Results of the French Childhood Cancer Survivor Study
Source: Oxford University Press journal article supplement (doi:10.1158/1055-9965.epi-21-0193), 2021-07-28
Supplement: 10559965epi210193-sup-260720_3_supp_7211417_qv7tpm.docx [file 10559965epi210193-sup-260720_3_supp_7211417_qv7tpm.docx]

**Smoking and cannabis use among childhood cancer survivors:
results of the French Childhood Cancer Survivor Study**

**Supplementary data**

**Table S1**. Association between current smoking and current cannabis use among childhood cancer survivors from the FCCSS cohort (N=2,877).

|  | | | | |
| --- | --- | --- | --- | --- |
|  |  | **Current cannabis use** | |  |
|  |  | **No** | **Yes** |  |
|  |  | n (%) | n (%) | *p-valuea* |
| Current smoking | No | 2088 (77.4%) | 52 (27,5%) | ***< 0.001*** |
|  | Yes | 610 (22.6%) | 137 (72.5%) |  |
| a Chi-square test. |  |  |  |  |
